# Supplementary material
Source: PubMed Central journal article supplement (PMC9717638)
Supplement: KID.0003632022-s0001.pdf [file KID.0003632022-s0001.pdf]

## **Supplementary material**

### **Table of contents**

- **Supplementary Figure S1 (A-J)**
- **Supplementary Figure S2**
- **Supplementary Figure S3**
- **Supplementary Figure S4**
- **Supplementary Table S1**

**Supplementary Figure S1.** Immunoblots of analysed proteins in all participants. Each image was merged by a chemiluminescent blot image with a colorimetric image of the same blot using Image Lab software. pT53/58-NCC of the fifth image was a chemiluminescent blot image. The control on each blot is a uEV pool containing resuspension of mixed uEVs isolated from a large amount of urine collected from two healthy volunteers between 9AM and 4PM on multiple days.

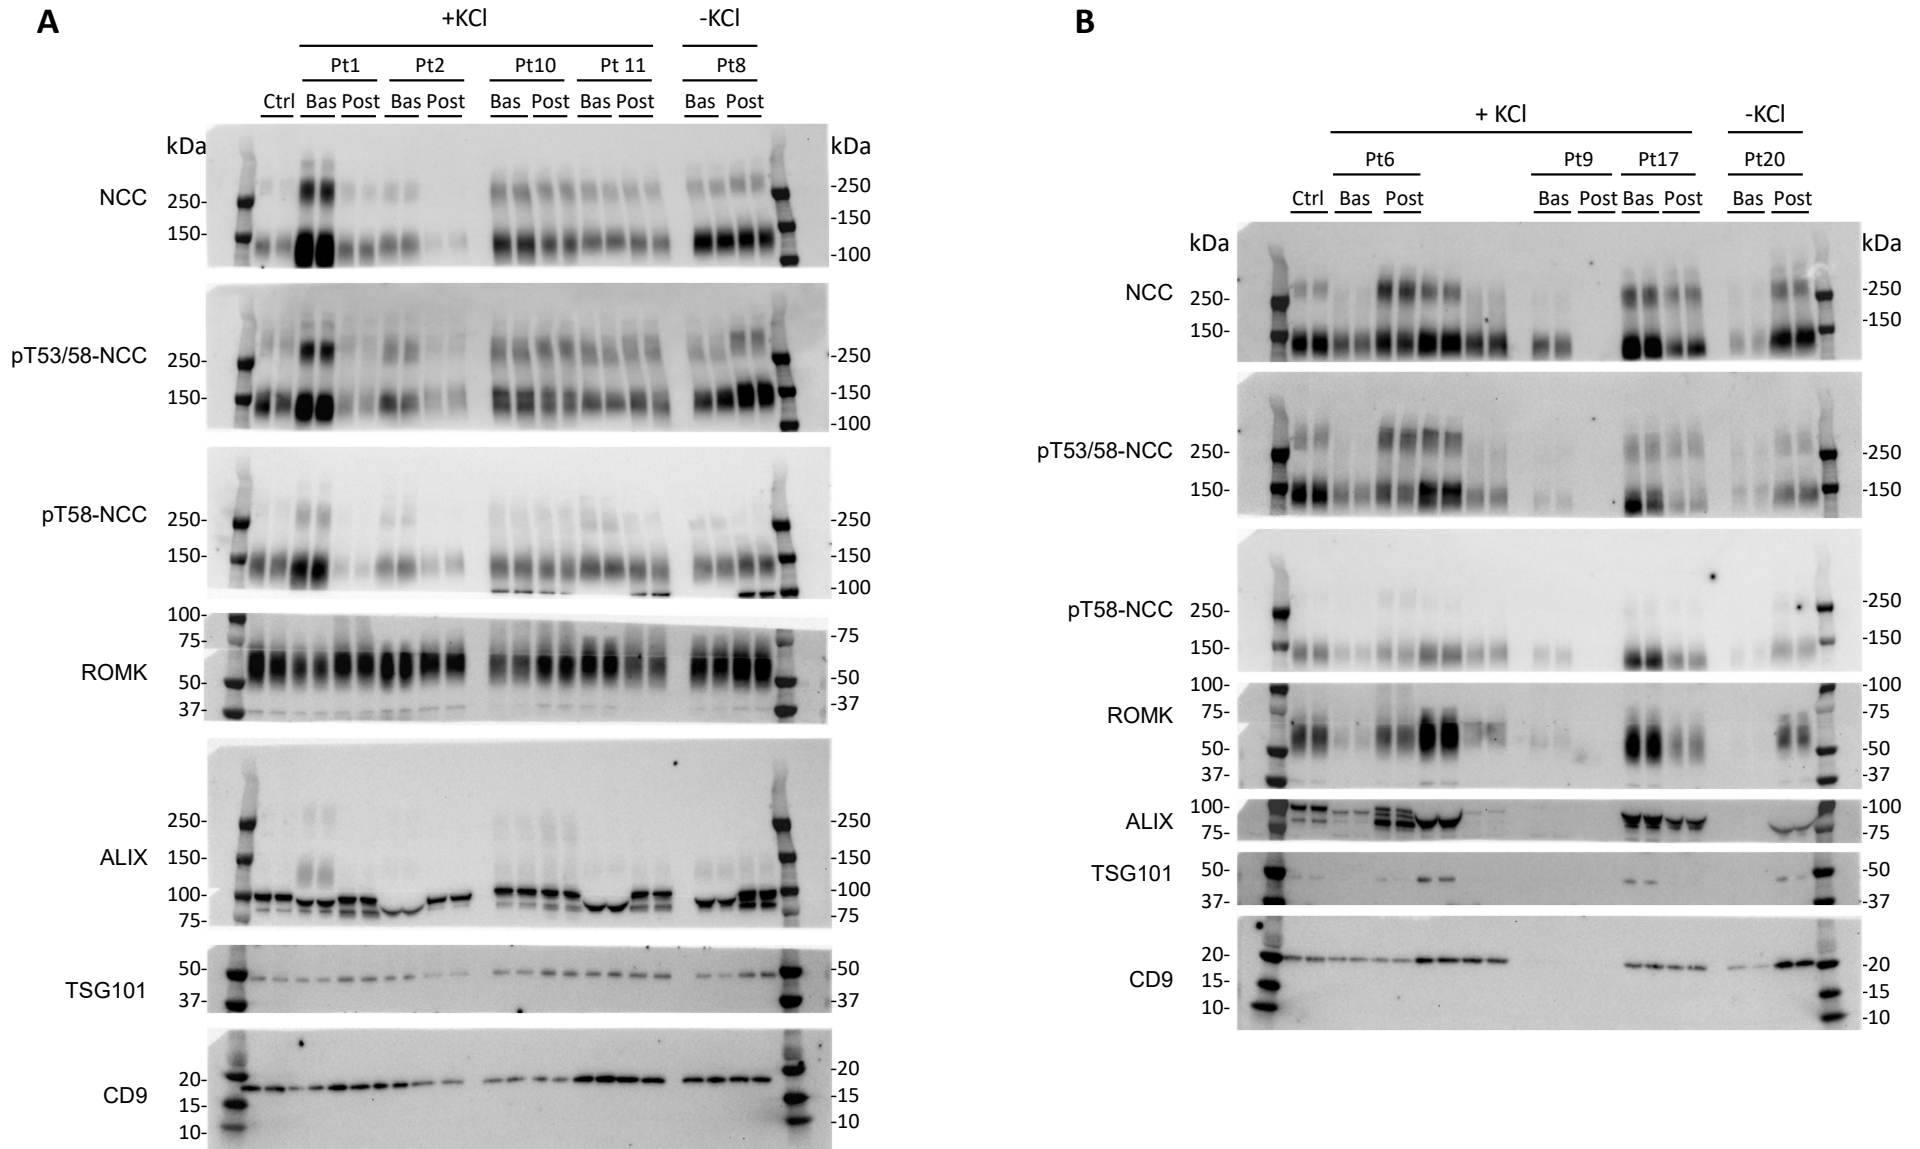



**Supplementary Figure S1**

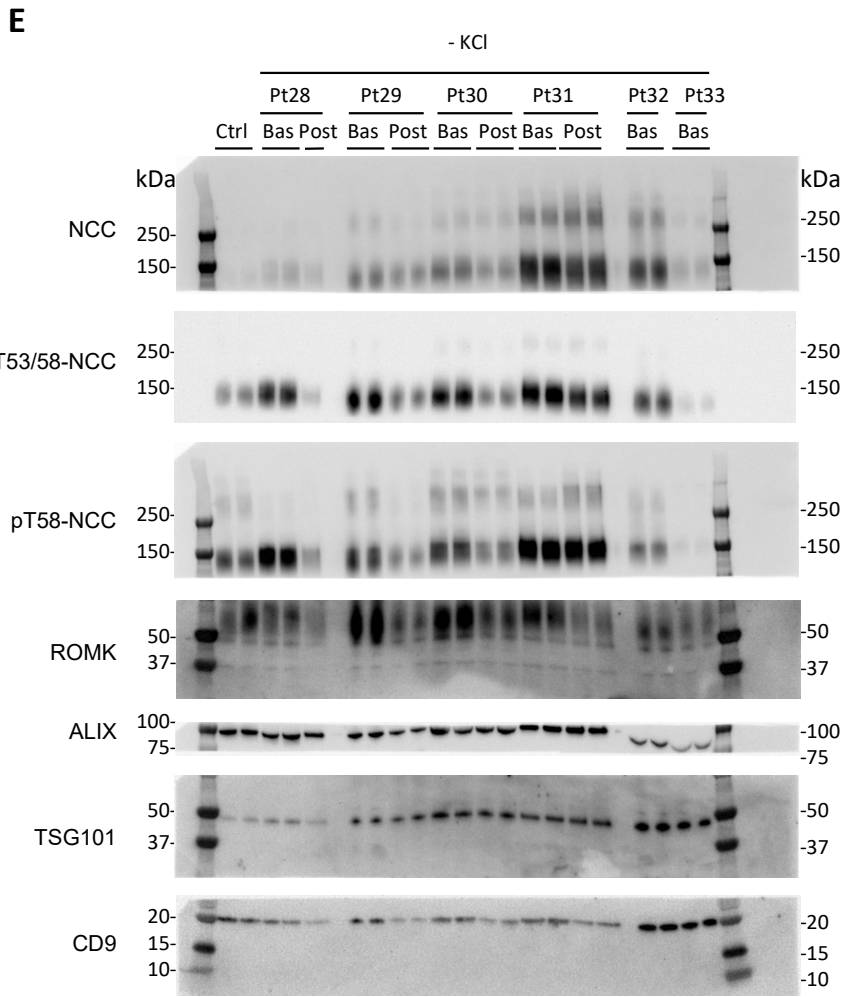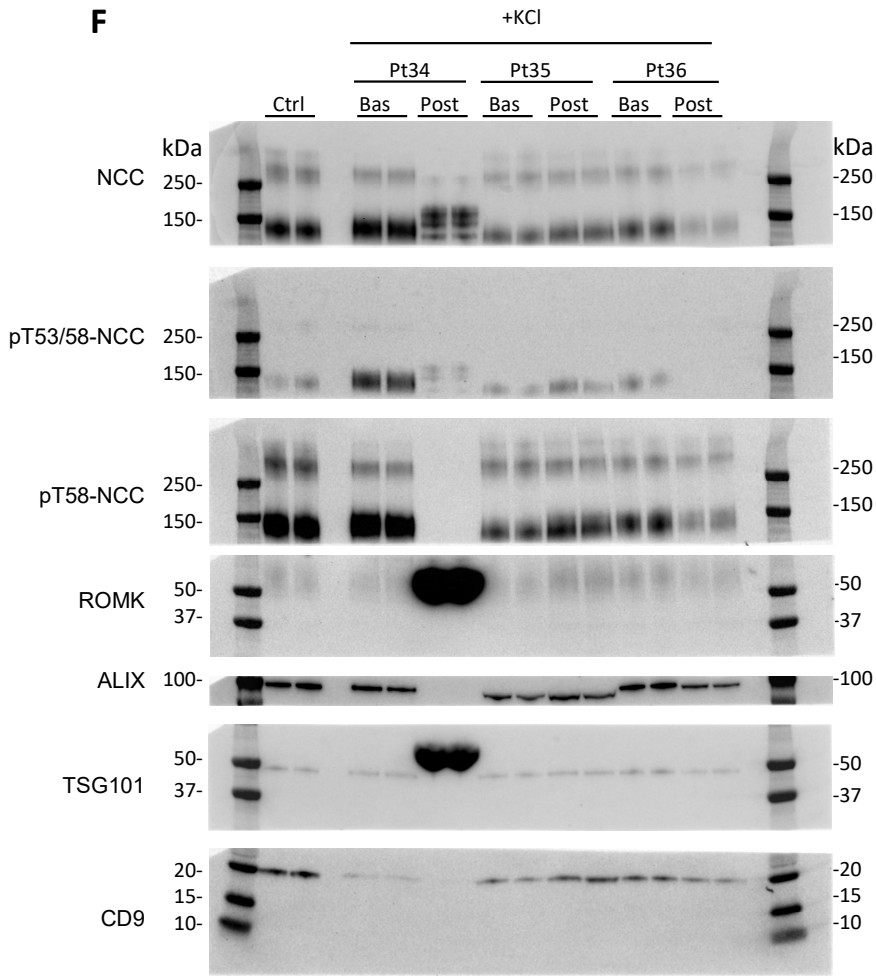



Supplementary Figure S1

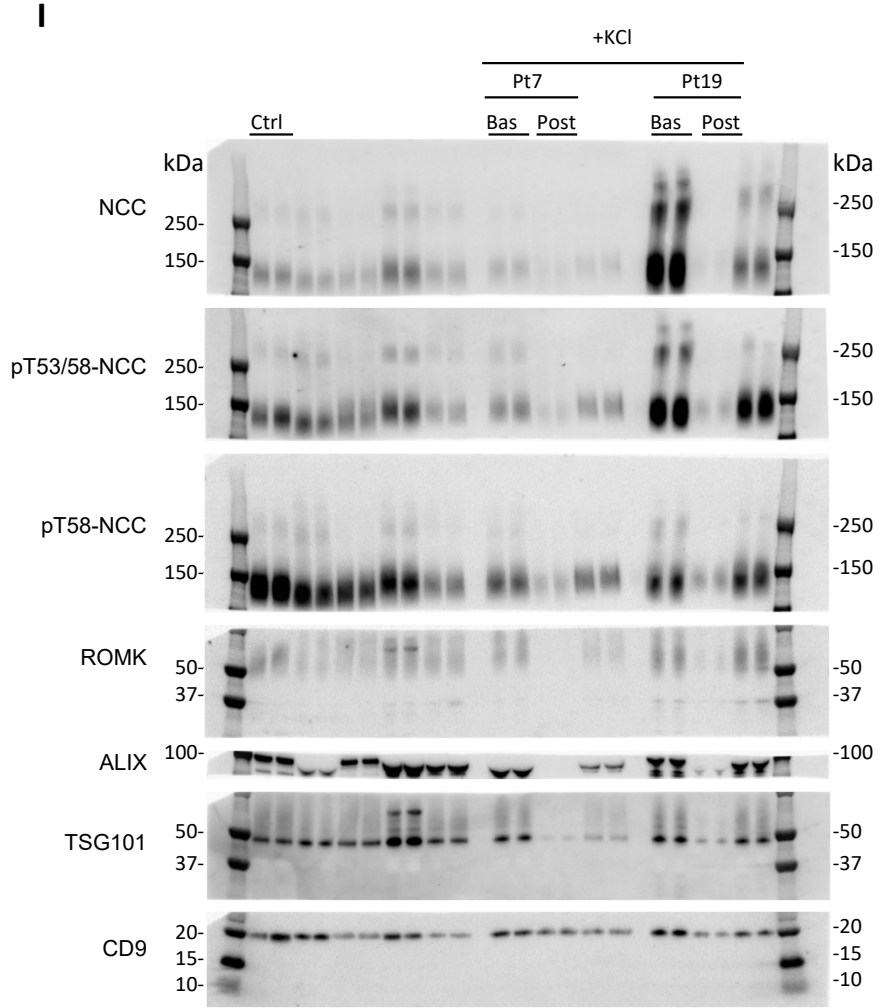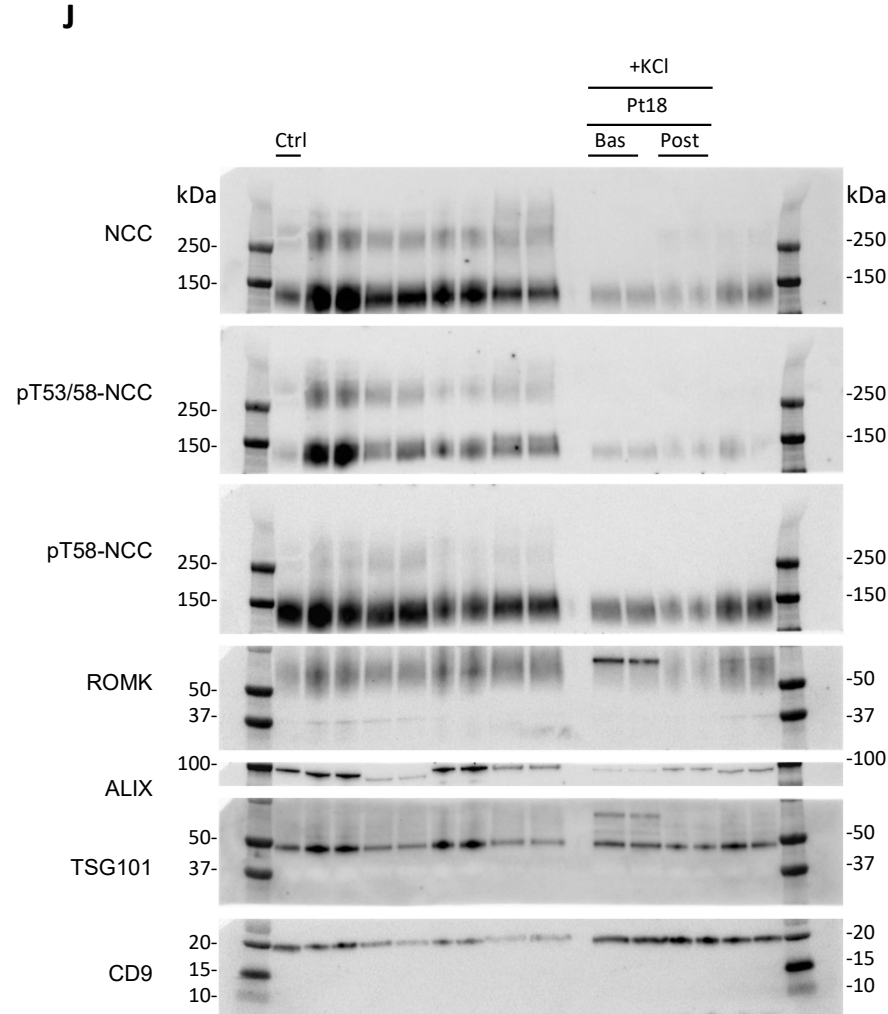

**Supplementary Figure S2.** Changes of absolute abundances of uEV proteins among the 26 PA patients within the 24-hour experiment period.

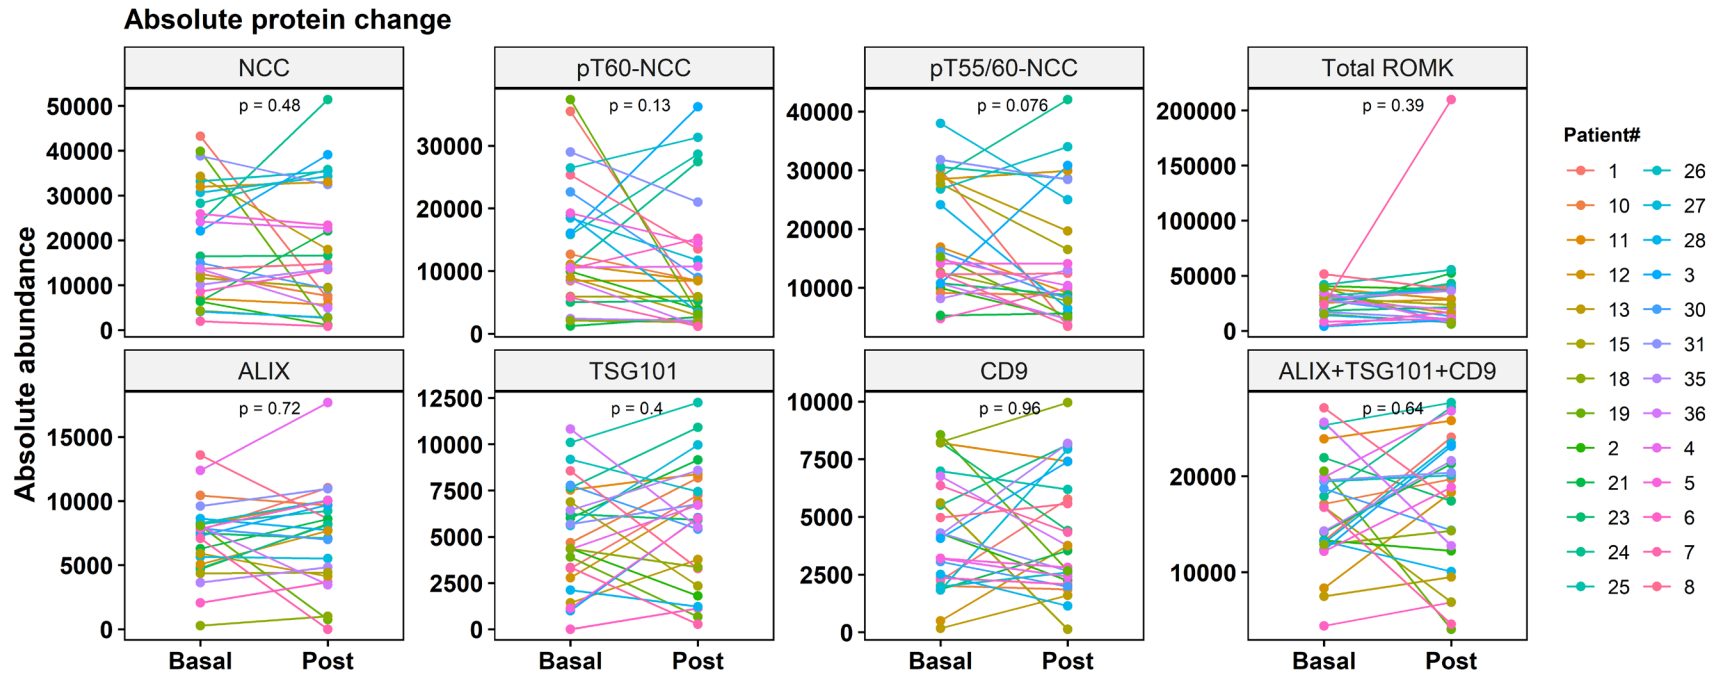

# Supplemental Figure S3. Correlations of the analysed proteins with biochemical parameters.

Test • Basal • Post

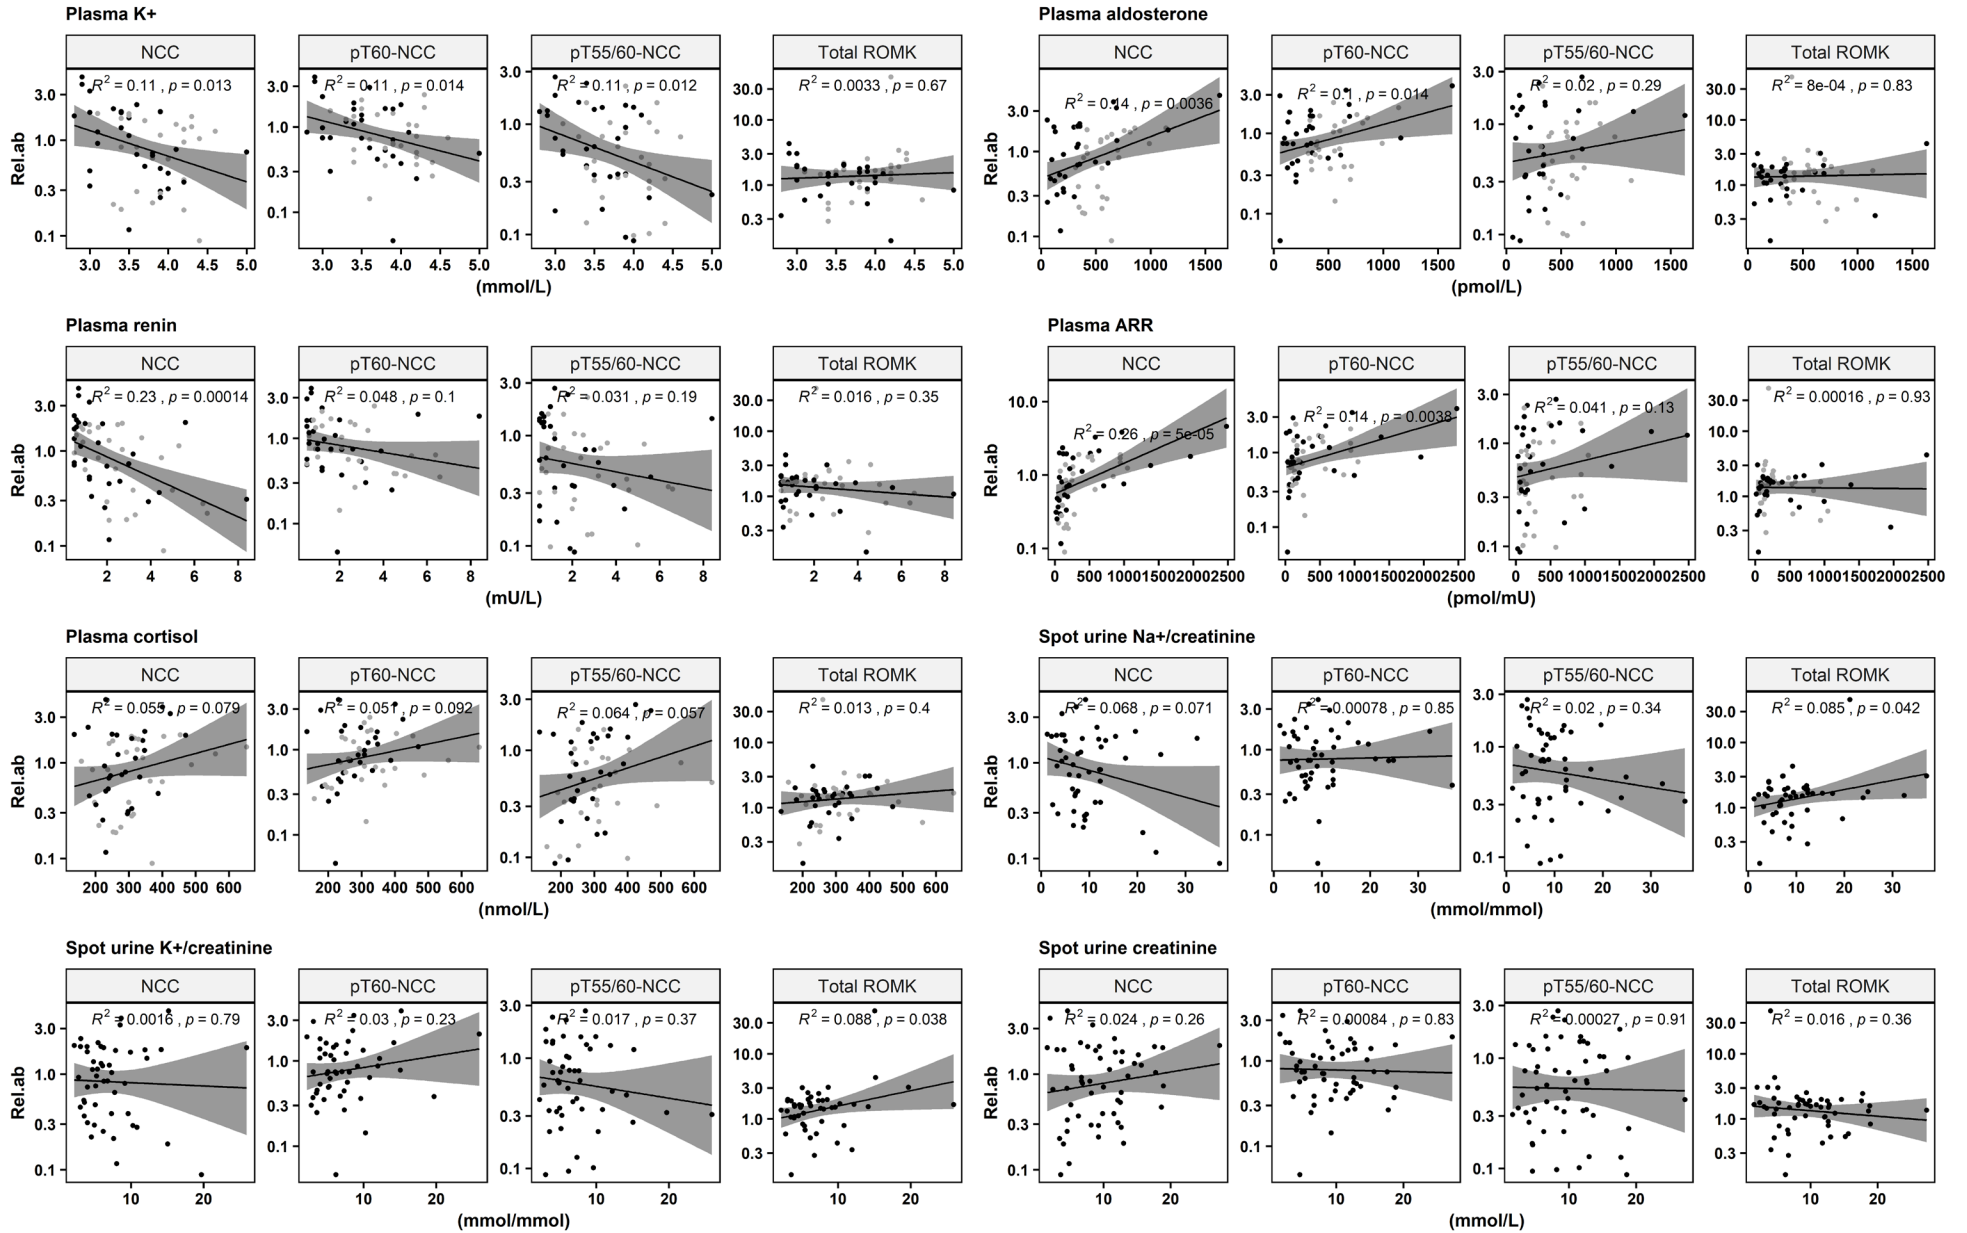



**Supplemental Figure S4.** Correlation between changes in plasma K<sup>+</sup> and plasma aldosterone in PA patients receiving KCl replacement.

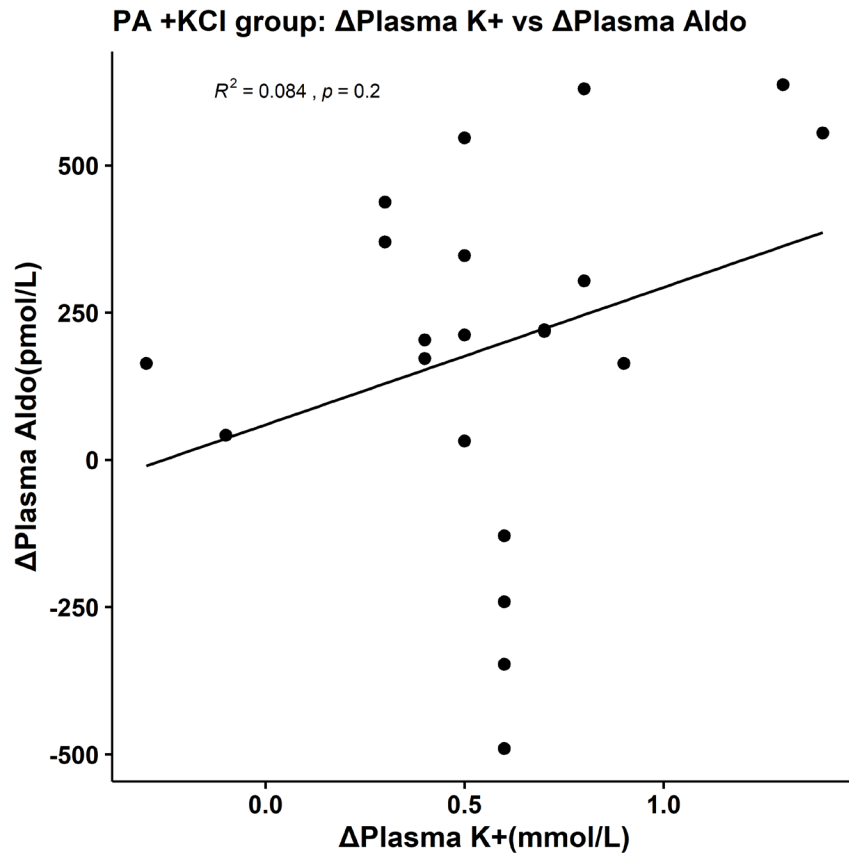

**Supplemental Table S1.** Detection of EV-enriched proteins in each uEV isolate, and sample inclusion in analyses.

| Patient No. | Basal uEV isolate |        |     |                             | Post-test uEV isolate |        |     |                             | SSST Diagnosis | Included in baseline differences | Included in paired comparison | Included in correlation analyses |           |
|-------------|-------------------|--------|-----|-----------------------------|-----------------------|--------|-----|-----------------------------|----------------|----------------------------------|-------------------------------|----------------------------------|-----------|
|             | ALIX              | TSG101 | CD9 | Successful isolation of uEV | ALIX                  | TSG101 | CD9 | Successful isolation of uEV |                |                                  |                               | Basal                            | Post-test |
| 1           | +                 | +      | +   | +                           | +                     | +      | +   | +                           | PA             | Yes                              | Yes                           | Yes                              | Yes       |
| 2           | +                 | +      | +   | +                           | +                     | +      | +   | +                           | PA             | Yes                              | Yes                           | Yes                              | Yes       |
| 3           | +                 | +      | +   | +                           | +                     | +      | +   | +                           | PA             | Yes                              | Yes                           | Yes                              | Yes       |
| 4           | +                 | +      | +   | +                           | +                     | +      | +   | +                           | PA             | Yes                              | Yes                           | Yes                              | Yes       |
| 5           | +                 | +      | +   | +                           | +                     | +      | +   | +                           | PA             | Yes                              | Yes                           | Yes                              | Yes       |
| 6           | +                 | -      | +   | +                           | +                     | +      | +   | +                           | PA             | Yes                              | Yes                           | Yes                              | Yes       |
| 7           | +                 | +      | +   | +                           | -                     | +      | +   | +                           | PA             | Yes                              | Yes                           | Yes                              | Yes       |
| 8           | +                 | +      | +   | +                           | +                     | +      | +   | +                           | PA             | Yes                              | Yes                           | Yes                              | Yes       |
| 9           | +                 | -      | -   | -                           | -                     | -      | -   | -                           | PA             | No                               | No                            | No                               | No        |
| 10          | +                 | +      | +   | +                           | +                     | +      | +   | +                           | PA             | Yes                              | Yes                           | Yes                              | Yes       |
| 11          | +                 | +      | +   | +                           | +                     | +      | +   | +                           | PA             | Yes                              | Yes                           | Yes                              | Yes       |
| 12          | +                 | +      | +   | +                           | +                     | +      | +   | +                           | PA             | Yes                              | Yes                           | Yes                              | Yes       |
| 13          | +                 | +      | +   | +                           | +                     | +      | +   | +                           | PA             | Yes                              | Yes                           | Yes                              | Yes       |
| 14          | +                 | +      | +   | +                           | +                     | +      | +   | +                           | LRH            | NA                               | NA                            | NA                               | NA        |
| 15          | +                 | +      | +   | +                           | +                     | +      | +   | +                           | PA             | Yes                              | Yes                           | Yes                              | Yes       |
| 16          | -                 | +      | +   | +                           | -                     | -      | +   | -                           | LRH            | NA                               | NA                            | NA                               | NA        |
| 17          | +                 | +      | +   | +                           | +                     | -      | +   | +                           | LRH            | NA                               | NA                            | NA                               | NA        |
| 18          | +                 | +      | +   | +                           | +                     | +      | +   | +                           | PA             | Yes                              | Yes                           | Yes                              | Yes       |
| 19          | +                 | +      | +   | +                           | +                     | +      | +   | +                           | PA             | Yes                              | Yes                           | Yes                              | Yes       |
| 20          | -                 | -      | +   | -                           | +                     | +      | +   | +                           | PA             | No                               | No                            | No                               | Yes       |
| 21          | +                 | +      | +   | +                           | +                     | +      | +   | +                           | PA             | Yes                              | Yes                           | Yes                              | Yes       |
| 22          | -                 | +      | +   | +                           | +                     | +      | +   | +                           | LRH            | NA                               | NA                            | NA                               | NA        |
| 23          | +                 | +      | +   | +                           | +                     | +      | +   | +                           | PA             | Yes                              | Yes                           | Yes                              | Yes       |

|     |   |   |   |   |    |    |    |    |     |                    |                    |                       |                        |
|-----|---|---|---|---|----|----|----|----|-----|--------------------|--------------------|-----------------------|------------------------|
| 24  | + | + | + | + | +  | +  | +  | +  | PA  | Yes                | Yes                | Yes                   | Yes                    |
| 25  | + | + | + | + | +  | +  | +  | +  | PA  | Yes                | Yes                | Yes                   | Yes                    |
| 26  | + | + | + | + | +  | +  | +  | +  | PA  | Yes                | Yes                | Yes                   | Yes                    |
| 27  | + | + | + | + | +  | +  | +  | +  | PA  | Yes                | Yes                | Yes                   | Yes                    |
| 28  | + | + | + | + | +  | +  | +  | +  | PA  | Yes                | Yes                | Yes                   | Yes                    |
| 29  | + | + | + | + | +  | +  | +  | +  | LRH | NA                 | NA                 | NA                    | NA                     |
| 30  | + | + | + | + | +  | +  | +  | +  | PA  | Yes                | Yes                | Yes                   | Yes                    |
| 31  | + | + | + | + | +  | +  | +  | +  | PA  | Yes                | Yes                | Yes                   | Yes                    |
| 32  | + | + | + | + | NA | NA | NA | NA | PA  | Yes                | No                 | Yes                   | NA                     |
| 33  | + | + | + | + | NA | NA | NA | NA | PA  | Yes                | No                 | Yes                   | NA                     |
| 34  | + | + | + | + | -  | -  | -  | -  | PA  | Yes                | No                 | Yes                   | No                     |
| 35  | + | + | + | + | +  | +  | +  | +  | PA  | Yes                | Yes                | Yes                   | Yes                    |
| 36  | + | + | + | + | +  | +  | +  | +  | PA  | Yes                | Yes                | Yes                   | Yes                    |
| 37  | + | + | + | + | -  | -  | +  | -  | PA  | Yes                | No                 | Yes                   | No                     |
| 38  | + | + | + | + | +  | +  | +  | +  | LRH | NA                 | NA                 | NA                    | NA                     |
| Sum |   |   |   |   |    |    |    |    |     | Yes30,<br>No2, NA6 | Yes26,<br>No6, NA6 | Yes30,<br>No2,<br>NA6 | Yes 27,<br>No3,<br>NA8 |

+, detected in uEV isolate; -, not detected in uEV isolate; NA, not applicable (inadequate urine for uEV isolation or patients who were diagnosed of LRH that excluded in analyses). Yes, included in analyses; No, not included in analyses.
